# Supplementary material
Source: MDPI journal article supplement (https://www.mdpi.com/2079-6412/12/8/1097)
Supplement: s1 [file s1]

# Supplementary file

## Influence of Magnesium Content on the Physico-Chemical Properties of Hydroxyapatite Electrochemically Deposited on a Nanostructured Titanium Surface

Cosmin Mihai Cotrut , Elena Ungureanu , Ionut Cornel Ionescu \*, Raluca Ioana Zamfir, Adrian Emil Kiss, Anca Constantina Parau, Alina Vladescu, Diana Maria Vranceanu\* and Adriana Saceleanu

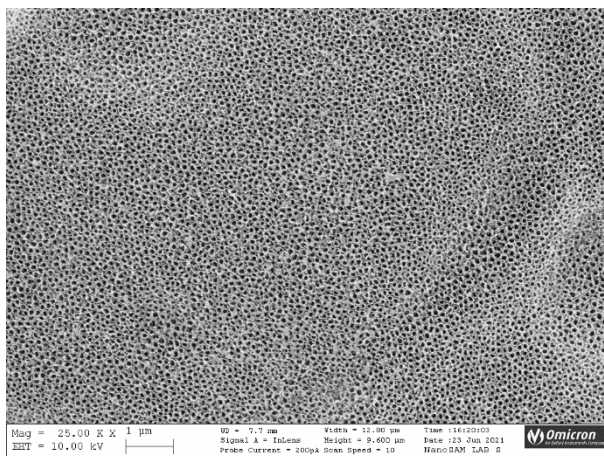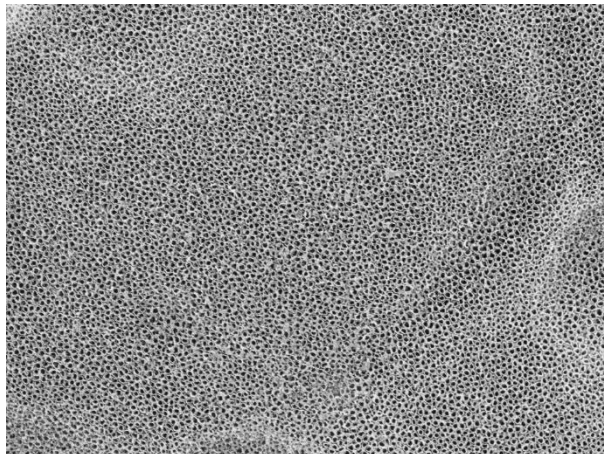

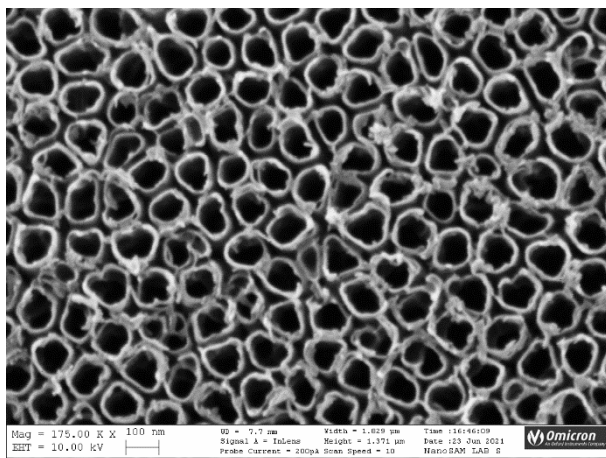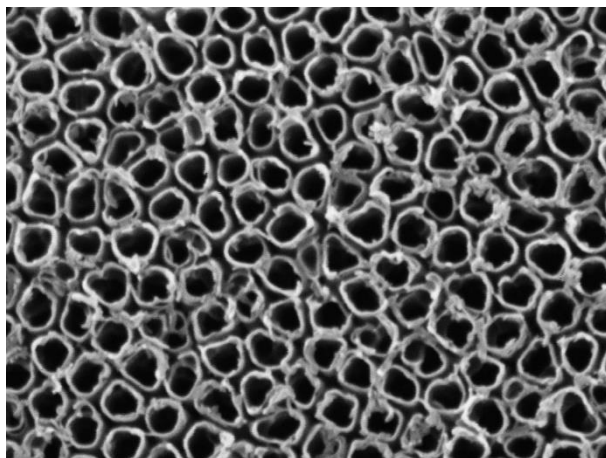

**Figure S1.** SEM images of the nanostructured surface after annealing (the original SEM images used in Figure 1)

H

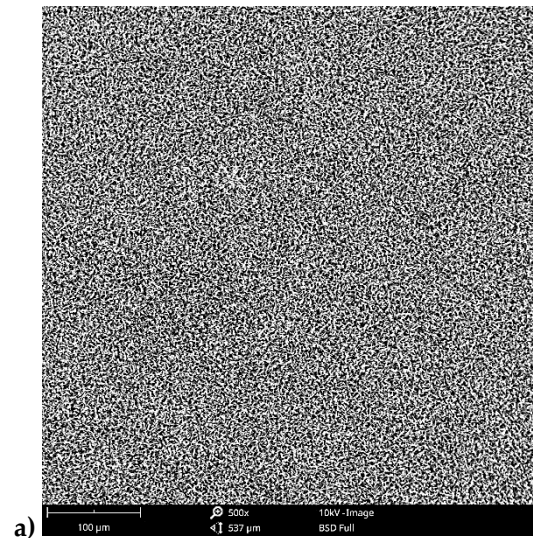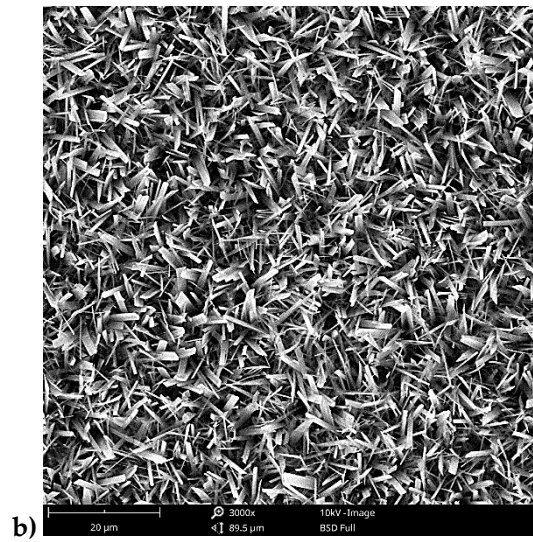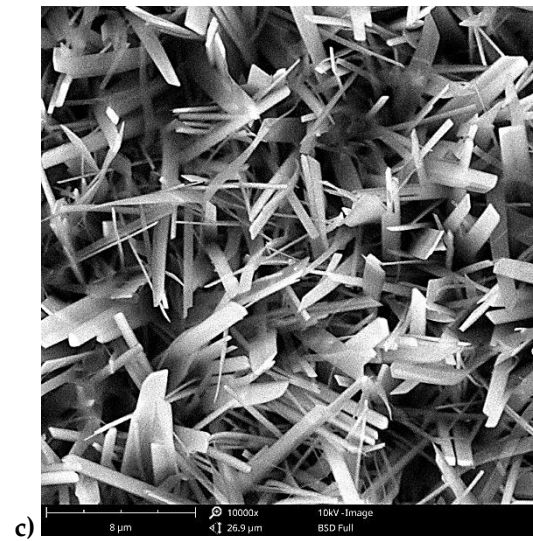

H/Mg1

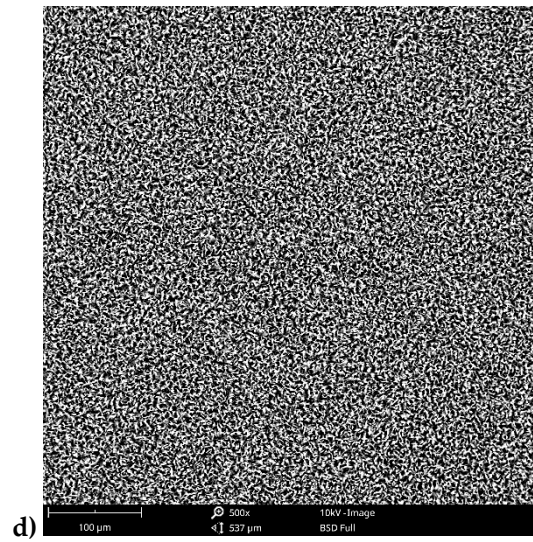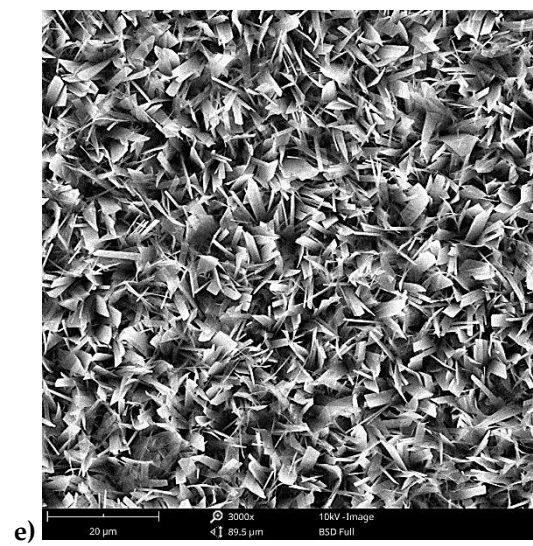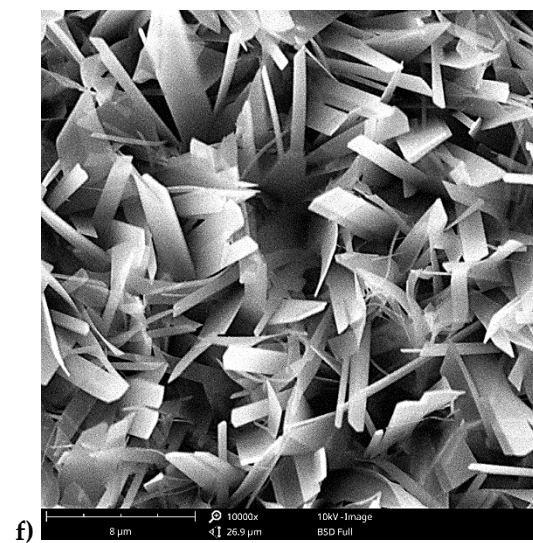

H/Mg2

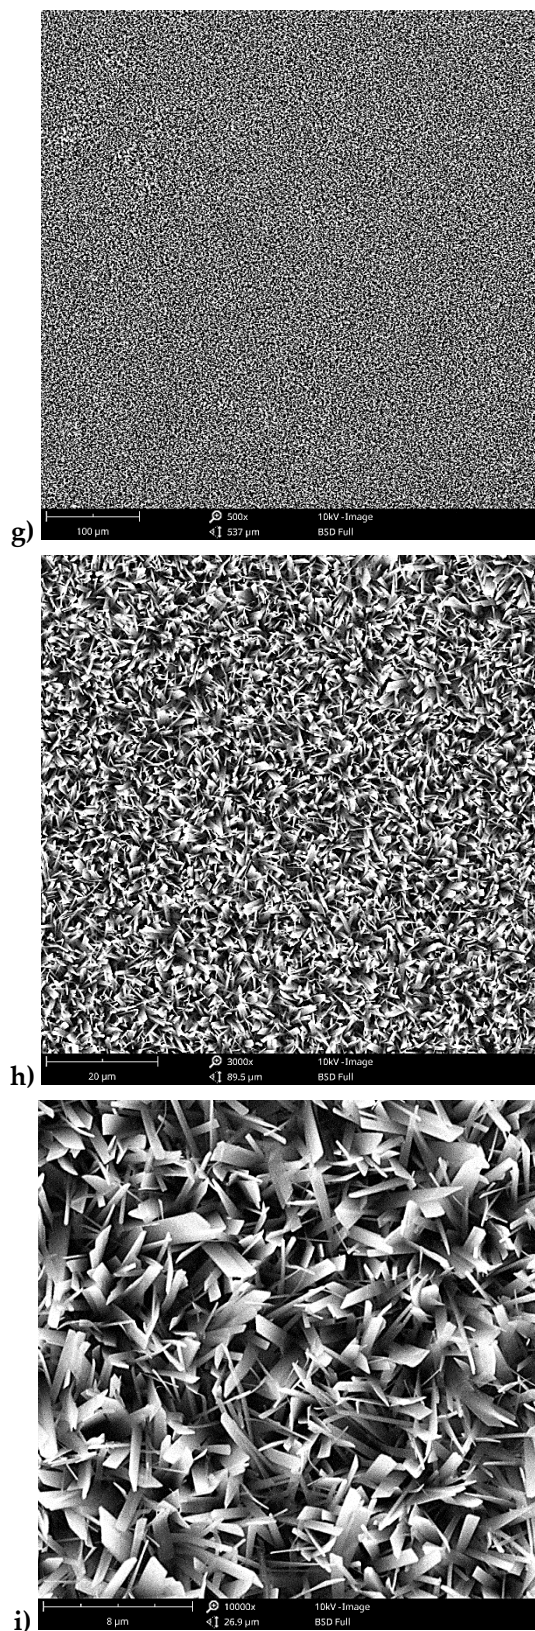

**Figure S2.** Morphology of the H (a—c), H/Mg1 (d—f) and H/Mg2 (g—i) coatings deposited on the nanostructured surfaces (the original SEM images used in Figure 2)

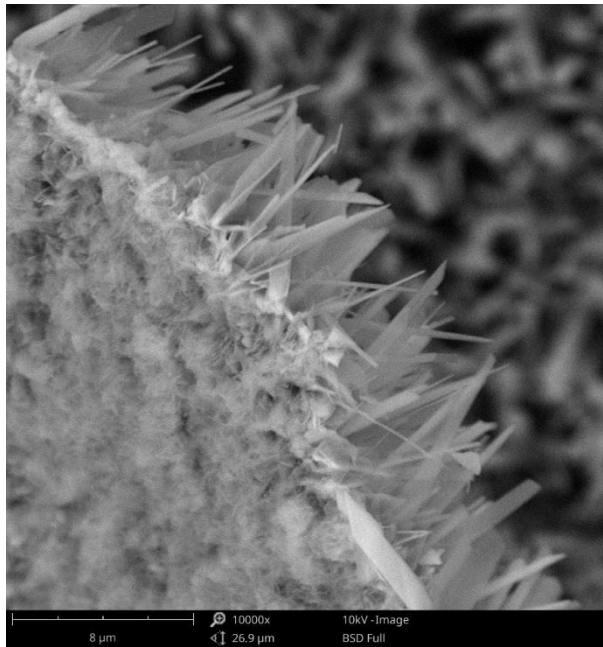

**Figure S3.** Representative SEM images of the Mg doped HAp coatings (H/Mg2) in section without (a) and with (b) annotations (the original SEM images used in Figure 3)

H

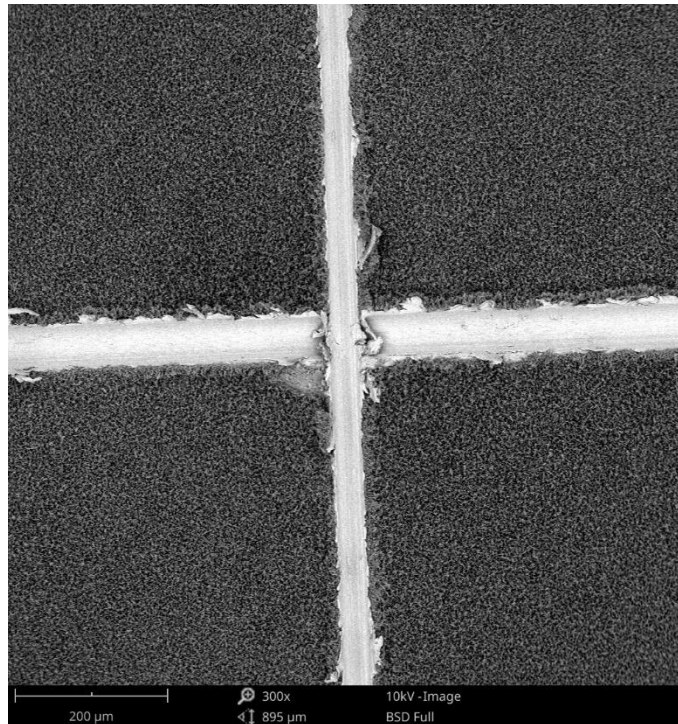

H/Mg1

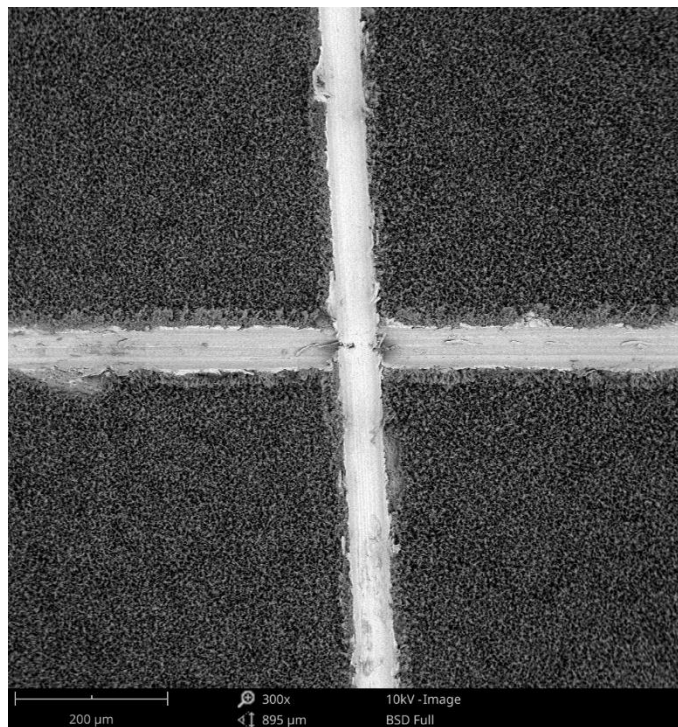



H/Mg2

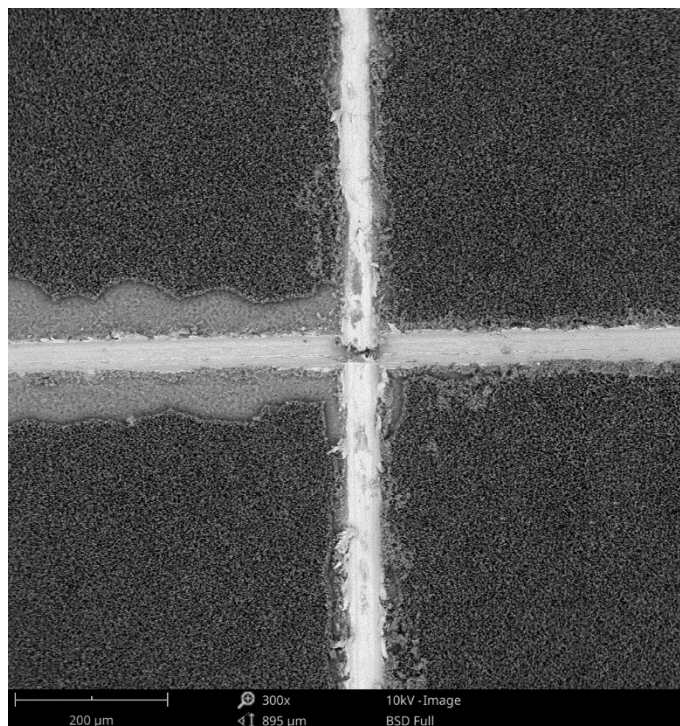

**Figure S4.** SEM images of the coatings deposited on nanostructured surface after the adhesion test (the original SEM images used in Figure 8)
